# Supplementary material for: RNA Sequencing Reveals the Upregulation of FOXO Signaling Pathway in Porphyromonas gingivalis Persister-Treated Human Gingival Epithelial Cells
Source: MDPI journal article supplement (doi:10.3390/ijms23105728), 2022-05-20
Supplement: s1 [file s1]

**Table S4** Numbers of genes mapped into the signaling pathways significantly enriched in the four comparison groups.

| Name                                   | Map      | M-PgPs vs. BL |      | <i>P. gingivalis</i> vs. BL |      | IL-1 $\beta$ + M-PgPs vs. IL-1 $\beta$ |      | IL-1 $\beta$ + <i>P. gingivalis</i> vs. IL-1 $\beta$ |      |
|----------------------------------------|----------|---------------|------|-----------------------------|------|----------------------------------------|------|------------------------------------------------------|------|
|                                        |          | Up            | Down | Up                          | Down | Up                                     | Down | Up                                                   | Down |
| Cytokine-cytokine receptor interaction | map04060 | 12            | 15   | 12                          | 20   | 14                                     | 22   | 17                                                   | 22   |
| Hematopoietic cell lineage             | map04640 | 6             | 9    | 7                           | 8    | 6                                      | 10   | 7                                                    | 12   |
| MAPK signaling pathway                 | map04010 | 18            | 13   | 18                          | 18   | 14                                     | 11   | 18                                                   | 13   |
| MicroRNAs in cancer                    | map05206 | 9             | 9    | 9                           | 10   | 12                                     | 7    | 12                                                   | 8    |
| Rap1 signaling pathway                 | map04015 | 17            | 7    | 16                          | 9    | 12                                     | 7    | 17                                                   | 7    |
| Rheumatoid arthritis                   | map05323 | 7             | 7    | 7                           | 9    | 4                                      | 14   | 8                                                    | 14   |
| TNF signaling pathway                  | map04668 | 2             | 13   | 2                           | 16   | 2                                      | 19   | 2                                                    | 19   |
| IL-17 signaling pathway                | map04657 | 0             | 14   | 0                           | 16   | 1                                      | 22   | 1                                                    | 22   |
| FoxO signaling pathway                 | map04068 | 12            | 6    | 13                          | 6    | 10                                     | 5    | 14                                                   | 7    |

|                                         |          |    |    |    |    |    |    |    |    |
|-----------------------------------------|----------|----|----|----|----|----|----|----|----|
| Osteoclast differentiation              | map04380 | 6  | 9  | 7  | 9  | 7  | 12 | 7  | 12 |
| PI3K-Akt signaling pathway              | map04151 | 17 | 15 | 15 | 19 | 12 | 16 | 18 | 18 |
| Transcriptional misregulation in cancer | map05202 | 20 | 5  | 19 | 10 | 24 | 11 | 24 | 13 |
| Inflammatory bowel disease (IBD)        | map05321 | 3  | 6  | 2  | 9  | 2  | 11 | 5  | 9  |
| Salmonella infection                    | map05132 | 3  | 11 | 2  | 13 | 3  | 13 | 3  | 13 |
| Hippo signaling pathway                 | map04390 | 9  | 8  | 13 | 9  | 13 | 9  | 17 | 9  |
| Human papillomavirus infection          | map05165 | 12 | 14 | 14 | 16 | 17 | 12 | 21 | 11 |
| Basal cell carcinoma                    | map05217 | 5  | 3  | 7  | 5  | 8  | 3  | 9  | 3  |
| Breast cancer                           | map05224 | 7  | 7  | 9  | 8  | 11 | 5  | 13 | 5  |
| Toll-like receptor signaling pathway    | map04620 | 5  | 6  | 4  | 8  | 4  | 10 | 5  | 9  |
| Pathways in cancer                      | map05200 | 20 | 19 | 22 | 25 | 27 | 22 | 33 | 22 |
