# Supplementary material for: RNA Sequencing Reveals the Upregulation of FOXO Signaling Pathway in Porphyromonas gingivalis Persister-Treated Human Gingival Epithelial Cells
Source: MDPI journal article supplement (doi:10.3390/ijms23105728), 2022-05-20
Supplement: s1 [file s1]

**Table S1** The top 20 DEGs similarly identified in the four comparison groups

| The top 20 upregulated genes (based on the Log2 fold change of M-PgPs vs BL) |           |                  |                                |                                               |                                                            |
|------------------------------------------------------------------------------|-----------|------------------|--------------------------------|-----------------------------------------------|------------------------------------------------------------|
| Gene ID                                                                      | Gene Name | Log2 Fold Change |                                |                                               |                                                            |
|                                                                              |           | M-PgPs<br>vs. BL | <i>P. gingivalis</i> vs.<br>BL | IL-1 $\beta$ +<br>M-PgPs vs. IL-<br>1 $\beta$ | IL-1 $\beta$ +<br><i>P. gingivalis</i> vs.<br>IL-1 $\beta$ |
| ENSG00000165272                                                              | AQP3      | 4.3989324        | 4.4712577                      | 4.0658647                                     | 4.3527156                                                  |
| ENSG00000156804                                                              | FBXO32    | 3.3677506        | 3.5436826                      | 2.7649915                                     | 2.9119453                                                  |
| ENSG00000163347                                                              | CLDN1     | 3.3113900        | 3.3812388                      | 2.5847055                                     | 2.7225392                                                  |
| ENSG00000171346                                                              | KRT15     | 3.2009895        | 3.2000906                      | 3.7679138                                     | 3.8835062                                                  |
| ENSG00000184113                                                              | CLDN5     | 3.0890181        | 3.1340865                      | 3.0321418                                     | 3.1106725                                                  |
| ENSG00000148926                                                              | ADM       | 2.9501664        | 3.4027730                      | 1.8394358                                     | 2.0073592                                                  |
| ENSG00000170271                                                              | FAXDC2    | 2.8522659        | 2.8428846                      | 3.5889795                                     | 3.7786953                                                  |
| ENSG00000180573                                                              | HIST1H2AC | 2.6889626        | 2.7042439                      | 2.5626884                                     | 2.6647273                                                  |
| ENSG00000185909                                                              | KLHDC8B   | 2.5671331        | 2.6950338                      | 2.5366656                                     | 2.6896529                                                  |

|                 |      |           |           |           |           |
|-----------------|------|-----------|-----------|-----------|-----------|
| ENSG00000164120 | HPGD | 2.4769272 | 2.4654177 | 2.6926484 | 2.7796053 |
|-----------------|------|-----------|-----------|-----------|-----------|

|                 |      |           |           |           |           |
|-----------------|------|-----------|-----------|-----------|-----------|
| ENSG00000102760 | RGCC | 2.4182401 | 2.4827123 | 2.8747440 | 3.2042561 |
|-----------------|------|-----------|-----------|-----------|-----------|

|                 |      |           |           |           |           |
|-----------------|------|-----------|-----------|-----------|-----------|
| ENSG00000141738 | GRB7 | 2.3403069 | 2.4879869 | 2.2037920 | 2.2856637 |
|-----------------|------|-----------|-----------|-----------|-----------|

|                 |         |           |           |           |           |
|-----------------|---------|-----------|-----------|-----------|-----------|
| ENSG00000157514 | TSC22D3 | 2.2969590 | 2.4523933 | 2.6846517 | 2.8050771 |
|-----------------|---------|-----------|-----------|-----------|-----------|

|                 |         |           |           |           |           |
|-----------------|---------|-----------|-----------|-----------|-----------|
| ENSG00000100100 | PIK3IP1 | 2.0832630 | 1.5522600 | 1.4287081 | 1.4642139 |
|-----------------|---------|-----------|-----------|-----------|-----------|

|                 |        |           |           |           |           |
|-----------------|--------|-----------|-----------|-----------|-----------|
| ENSG00000170412 | GPRC5C | 1.7768729 | 1.9121728 | 1.5789644 | 1.6480662 |
|-----------------|--------|-----------|-----------|-----------|-----------|

|                 |      |           |           |           |           |
|-----------------|------|-----------|-----------|-----------|-----------|
| ENSG00000107262 | BAG1 | 1.6184454 | 1.7396585 | 1.6144949 | 3.7786953 |
|-----------------|------|-----------|-----------|-----------|-----------|

|                 |      |           |           |           |           |
|-----------------|------|-----------|-----------|-----------|-----------|
| ENSG00000135821 | GLUL | 1.6099119 | 1.5463754 | 1.7375424 | 1.8410556 |
|-----------------|------|-----------|-----------|-----------|-----------|

|                 |       |           |           |           |           |
|-----------------|-------|-----------|-----------|-----------|-----------|
| ENSG00000176046 | NUPR1 | 1.5165685 | 1.6973238 | 1.8522223 | 1.9969648 |
|-----------------|-------|-----------|-----------|-----------|-----------|

|                 |        |           |           |           |           |
|-----------------|--------|-----------|-----------|-----------|-----------|
| ENSG00000151632 | AKR1C2 | 1.5006107 | 1.5522600 | 1.3231291 | 1.3745780 |
|-----------------|--------|-----------|-----------|-----------|-----------|

|                 |      |           |           |           |           |
|-----------------|------|-----------|-----------|-----------|-----------|
| ENSG00000189221 | MAOA | 1.3363730 | 1.3044064 | 1.1425614 | 1.2189908 |
|-----------------|------|-----------|-----------|-----------|-----------|

---

| Top 20 down-regulated genes (based on the Log2 fold change of M-PgPs vs BL) |  |  |  |  |  |
|-----------------------------------------------------------------------------|--|--|--|--|--|
|-----------------------------------------------------------------------------|--|--|--|--|--|

---

| Gene ID | Gene Name | Log2 Fold Change |  |  |  |
|---------|-----------|------------------|--|--|--|
|---------|-----------|------------------|--|--|--|

---

|                 |         | M-PgPs<br>vs. BL | <i>P. gingivalis</i> vs.<br>BL | IL-1 $\beta$ +<br>M-PgPs vs.<br>IL-1 $\beta$ | IL-1 $\beta$ +<br><i>P. gingivalis</i> vs.<br>IL-1 $\beta$ |
|-----------------|---------|------------------|--------------------------------|----------------------------------------------|------------------------------------------------------------|
| ENSG00000171617 | ENC1    | -2.3268292       | -1.8995164                     | -1.7545489                                   | -1.9341888                                                 |
| ENSG00000112972 | HMGCS1  | -2.0692747       | -1.7628486                     | -1.6888997                                   | -1.9477261                                                 |
| ENSG00000172115 | CYCS    | -1.9893248       | -1.8407531                     | -1.8358900                                   | -2.0595387                                                 |
| ENSG00000087494 | PTHLH   | -1.8638933       | -1.6718268                     | -1.5432711                                   | -1.6349458                                                 |
| ENSG00000110092 | CCND1   | -1.7920013       | -1.5869896                     | -1.2159890                                   | -1.3516549                                                 |
| ENSG00000197451 | HNRNPAB | -1.7888619       | -1.5550501                     | -1.3888501                                   | -1.5050150                                                 |
| ENSG00000115008 | IL1A    | -1.7649250       | -1.7600241                     | -2.1189747                                   | -2.3718589                                                 |
| ENSG00000187678 | SPRY4   | -1.7486534       | -1.5309880                     | -1.3665313                                   | -1.5216728                                                 |
| ENSG00000168906 | MAT2A   | -1.7450236       | -1.3551784                     | -1.0564000                                   | -1.1385422                                                 |
| ENSG00000181649 | PHLDA2  | -1.7322295       | -1.6920877                     | -1.3914789                                   | -1.4721959                                                 |
| ENSG00000101670 | LIPG    | -1.7147466       | -1.5594333                     | -1.6504637                                   | -1.8641808                                                 |

|           |       |            |            |            |            |
|-----------|-------|------------|------------|------------|------------|
| ENSG00000 | F3    | -1.6186853 | -1.4603853 | -1.6458314 | -1.7419959 |
| 117525    |       |            |            |            |            |
| ENSG00000 | PLOD2 | -1.5182557 | -1.3388854 | -1.3695957 | -1.5010581 |
| 152952    |       |            |            |            |            |
| ENSG00000 | FOSL1 | -1.4753451 | -1.4303079 | -1.2413161 | -1.4041137 |
| 175592    |       |            |            |            |            |
| ENSG00000 | ACLY  | -1.4439539 | -1.2375327 | -1.1421869 | -1.2364041 |
| 131473    |       |            |            |            |            |
| ENSG00000 | FZD8  | -1.3924709 | -1.6889459 | -1.1354117 | -1.3666048 |
| 177283    |       |            |            |            |            |
| ENSG00000 | TGFA  | -1.3474170 | -1.2457886 | -1.4733297 | -1.6932265 |
| 163235    |       |            |            |            |            |
| ENSG00000 | AMD1  | -1.3238774 | -1.1323272 | -1.0846984 | -1.2378600 |
| 123505    |       |            |            |            |            |
| ENSG00000 | ETS1  | -1.2772555 | -1.1156367 | -1.2588583 | -1.3790420 |
| 134954    |       |            |            |            |            |
| ENSG00000 | HYOU1 | -1.0497075 | -1.0472391 | -1.0437086 | -1.1809964 |
| 149428    |       |            |            |            |            |

---
