# Supplementary material for: RNA Sequencing Reveals the Upregulation of FOXO Signaling Pathway in Porphyromonas gingivalis Persister-Treated Human Gingival Epithelial Cells
Source: MDPI journal article supplement (doi:10.3390/ijms23105728), 2022-05-20
Supplement: s1 [file s1]

**Table S3** The top 20 enriched GO terms in the four comparison groups.

| The top 20 enriched GO terms |                                          |             |             |             |
|------------------------------|------------------------------------------|-------------|-------------|-------------|
| M-PgPs vs. BL                |                                          |             |             |             |
| Cellular Component           |                                          |             |             |             |
| Term ID                      | Term name                                | p-value     | FDR         | Rich_Ratio  |
| GO:0016020                   | membrane                                 | 0.001544772 | 0.048724673 | 1.117390787 |
| GO:0044425                   | membrane part                            | 0.000462095 | 0.017490313 | 1.150084694 |
| GO:0016021                   | integral component of<br>membrane        | 0.000108129 | 0.005456906 | 1.206886141 |
| GO:0031224                   | intrinsic component of<br>membrane       | 6.51E-05    | 0.00391068  | 1.210726359 |
| GO:0044421                   | extracellular region part                | 7.09E-05    | 0.00391068  | 1.288610629 |
| GO:0005886                   | plasma membrane                          | 1.66E-06    | 0.000208995 | 1.298291045 |
| GO:0098588                   | bounding membrane of<br>organelle        | 0.000723392 | 0.024891271 | 1.350804467 |
| GO:0005576                   | extracellular region                     | 2.44E-06    | 0.00026351  | 1.526734751 |
| GO:0005794                   | Golgi apparatus                          | 0.000635668 | 0.022914304 | 1.56619592  |
| GO:0044459                   | plasma membrane part                     | 9.53E-15    | 7.22E-12    | 1.734717482 |
| GO:0005615                   | extracellular space                      | 4.89E-08    | 7.41E-06    | 1.745472876 |
| GO:0009986                   | cell surface                             | 0.000337542 | 0.013569589 | 1.760158035 |
| GO:0005911                   | cell-cell junction                       | 0.000340584 | 0.013569589 | 1.802976378 |
| GO:0098590                   | plasma membrane region                   | 4.01E-09    | 7.59E-07    | 1.961629174 |
| GO:0005887                   | integral component of<br>plasma membrane | 1.79E-12    | 4.52E-10    | 2.033848701 |

|            |                                           |             |             |             |
|------------|-------------------------------------------|-------------|-------------|-------------|
| GO:0031226 | intrinsic component of<br>plasma membrane | 2.21E-14    | 8.35E-12    | 2.092117665 |
| GO:0005788 | endoplasmic reticulum<br>lumen            | 0.000842157 | 0.027717953 | 2.123444396 |
| GO:0016324 | apical plasma membrane                    | 0.000221253 | 0.01002513  | 2.129476909 |
| GO:0043235 | receptor complex                          | 5.07E-05    | 0.003837522 | 2.328946897 |
| GO:0044815 | DNA packaging complex                     | 7.23E-05    | 0.00391068  | 2.852508603 |

### Biological Progress

| Term ID    | Term name                                                       | p-value     | FDR         | Rich_Ratio  |
|------------|-----------------------------------------------------------------|-------------|-------------|-------------|
| GO:0060255 | regulation of<br>macromolecule metabolic<br>process             | 0.002997535 | 0.033469096 | 1.139183582 |
| GO:0051171 | regulation of nitrogen<br>compound metabolic<br>process         | 0.000407828 | 0.007999238 | 1.17834463  |
| GO:0019222 | regulation of metabolic<br>process                              | 3.90E-05    | 0.001210112 | 1.189589208 |
| GO:2000112 | regulation of cellular<br>macromolecule<br>biosynthetic process | 0.001858006 | 0.023940384 | 1.196057866 |
| GO:0031326 | regulation of cellular<br>biosynthetic process                  | 0.001152953 | 0.017125893 | 1.1991352   |
| GO:0051252 | regulation of RNA<br>metabolic process                          | 0.002532461 | 0.029471066 | 1.199256508 |

|            |                                                                       |             |             |             |
|------------|-----------------------------------------------------------------------|-------------|-------------|-------------|
| GO:0010556 | regulation of<br>macromolecule<br>biosynthetic process                | 0.001354817 | 0.018973174 | 1.200369753 |
| GO:0019219 | regulation of nucleobase-<br>containing compound<br>metabolic process | 0.000887897 | 0.014027408 | 1.209332565 |
| GO:0080090 | regulation of primary<br>metabolic process                            | 2.14E-05    | 0.000725174 | 1.21464257  |
| GO:0009889 | regulation of biosynthetic<br>process                                 | 0.000261592 | 0.005725564 | 1.224667024 |
| GO:0031323 | regulation of cellular<br>metabolic process                           | 7.08E-06    | 0.000314162 | 1.226607476 |
| GO:0065007 | biological regulation                                                 | 6.57E-16    | 7.24E-13    | 1.230590315 |
| GO:0050789 | regulation of biological<br>process                                   | 8.93E-15    | 7.38E-12    | 1.233448056 |
| GO:0051246 | regulation of protein<br>metabolic process                            | 0.001833197 | 0.023940384 | 1.249609477 |
| GO:0043412 | macromolecule<br>modification                                         | 0.001389317 | 0.019330307 | 1.249644425 |
| GO:0050794 | regulation of cellular<br>process                                     | 1.11E-14    | 8.15E-12    | 1.252693975 |
| GO:2001141 | regulation of RNA<br>biosynthetic process                             | 0.000262931 | 0.00573113  | 1.257781596 |
| GO:0036211 | protein modification<br>process                                       | 0.001445032 | 0.019899294 | 1.258054091 |

|            |                                                        |             |             |             |
|------------|--------------------------------------------------------|-------------|-------------|-------------|
| GO:0006464 | cellular protein<br>modification process               | 0.001445032 | 0.019899294 | 1.258054091 |
| GO:1903506 | regulation of nucleic acid-<br>templated transcription | 0.000222316 | 0.005063624 | 1.26168205  |

### Molecular Function

| Term ID    | Term name                                                              | p-value     | FDR         | Rich_Ratio  |
|------------|------------------------------------------------------------------------|-------------|-------------|-------------|
| GO:0005515 | protein binding                                                        | 1.69E-07    | 0.000243742 | 1.228411104 |
| GO:0097367 | carbohydrate derivative<br>binding                                     | 0.000761161 | 0.027559296 | 1.290193119 |
| GO:0042802 | identical protein binding                                              | 0.00084454  | 0.027559296 | 1.321928093 |
| GO:0003700 | DNA binding transcription<br>factor activity                           | 0.000620007 | 0.024146767 | 1.363365539 |
| GO:0004871 | signal transducer activity                                             | 0.000600382 | 0.024146767 | 1.389246879 |
| GO:0016772 | transferase activity,<br>transferring phosphorus-<br>containing groups | 0.000612961 | 0.024146767 | 1.441627298 |
| GO:0005509 | calcium ion binding                                                    | 0.001859023 | 0.049608381 | 1.573589362 |
| GO:0005102 | receptor binding                                                       | 2.58E-06    | 0.001239321 | 1.578782527 |
| GO:0003690 | double-stranded DNA<br>binding                                         | 0.000294181 | 0.014617775 | 1.609246393 |
| GO:0032403 | protein complex binding                                                | 0.00169445  | 0.04606986  | 1.642006291 |
| GO:0043565 | sequence-specific DNA<br>binding                                       | 9.22E-06    | 0.001568905 | 1.674931385 |
| GO:0016301 | kinase activity                                                        | 1.00E-05    | 0.001568905 | 1.737290142 |

|            |                                                                            |          |             |             |
|------------|----------------------------------------------------------------------------|----------|-------------|-------------|
| GO:0001067 | regulatory region nucleic<br>acid binding                                  | 1.94E-05 | 0.001749836 | 1.742938196 |
| GO:0044212 | transcription regulatory<br>region DNA binding                             | 1.81E-05 | 0.001749836 | 1.747263104 |
| GO:0016773 | phosphotransferase<br>activity, alcohol group as<br>acceptor               | 1.20E-05 | 0.001568905 | 1.780950696 |
| GO:0004672 | protein kinase activity                                                    | 3.10E-05 | 0.002565334 | 1.817153629 |
| GO:1990837 | sequence-specific double-<br>stranded DNA binding                          | 1.56E-05 | 0.001726497 | 1.828233834 |
| GO:0000976 | transcription regulatory<br>region sequence-specific<br>DNA binding        | 1.07E-05 | 0.001568905 | 1.890848226 |
| GO:0000977 | RNA polymerase II<br>regulatory region<br>sequence-specific DNA<br>binding | 3.38E-05 | 0.002565334 | 1.906994246 |
| GO:0001012 | RNA polymerase II<br>regulatory region DNA<br>binding                      | 3.38E-05 | 0.002565334 | 1.906994246 |

---

*P. gingivalis* vs. BL

---

**Cellular Component**

| Term ID    | Term name                 | p-value     | FDR         | Rich_Ratio  |
|------------|---------------------------|-------------|-------------|-------------|
| GO:0044421 | extracellular region part | 0.000850752 | 0.032096554 | 1.218201922 |
| GO:0005886 | plasma membrane           | 2.90E-05    | 0.002674858 | 1.236691361 |

|            |                                                    |             |             |             |
|------------|----------------------------------------------------|-------------|-------------|-------------|
| GO:0098588 | bounding membrane of<br>organelle                  | 0.000732987 | 0.030122968 | 1.321991043 |
| GO:0044463 | cell projection part                               | 0.001721469 | 0.047627306 | 1.347465614 |
| GO:0120038 | plasma membrane<br>bounded cell projection<br>part | 0.001721469 | 0.047627306 | 1.347465614 |
| GO:0030054 | cell junction                                      | 0.000969408 | 0.034982977 | 1.372694207 |
| GO:0044433 | cytoplasmic vesicle part                           | 0.000668807 | 0.029396294 | 1.388694528 |
| GO:0005576 | extracellular region                               | 6.22E-07    | 7.38E-05    | 1.514402169 |
| GO:0005794 | Golgi apparatus                                    | 0.000184865 | 0.013948878 | 1.57648598  |
| GO:0005622 | intracellular                                      | 0.001620784 | 0.047627306 | 1.593390771 |
| GO:0005911 | cell-cell junction                                 | 0.001828168 | 0.048947733 | 1.623130222 |
| GO:0005615 | extracellular space                                | 4.00E-07    | 5.54E-05    | 1.629234807 |
| GO:0044459 | plasma membrane part                               | 1.50E-14    | 1.25E-11    | 1.668331447 |
| GO:0031253 | cell projection membrane                           | 0.000451138 | 0.024962952 | 1.880533066 |
| GO:0005887 | integral component of<br>plasma membrane           | 2.98E-11    | 8.24E-09    | 1.885463934 |
| GO:0098590 | plasma membrane region                             | 4.40E-10    | 9.14E-08    | 1.93978429  |
| GO:0016324 | apical plasma membrane                             | 0.000511836 | 0.026551509 | 1.958624787 |
| GO:0031226 | intrinsic component of<br>plasma membrane          | 8.86E-14    | 3.68E-11    | 1.972216184 |
| GO:0009986 | cell surface                                       | 3.49E-07    | 5.54E-05    | 2.04560278  |
| GO:0005788 | endoplasmic reticulum<br>lumen                     | 0.000562482 | 0.027462374 | 2.066342454 |

## Biological Progress

| Term ID    | Term name                                                       | p-value     | FDR         | Rich_Ratio  |
|------------|-----------------------------------------------------------------|-------------|-------------|-------------|
| GO:0010468 | regulation of gene<br>expression                                | 0.000256637 | 0.004251922 | 1.193472438 |
| GO:0060255 | regulation of<br>macromolecule metabolic<br>process             | 6.63E-06    | 0.000193295 | 1.203837674 |
| GO:0065007 | biological regulation                                           | 3.65E-20    | 4.45E-17    | 1.242584706 |
| GO:0019222 | regulation of metabolic<br>process                              | 1.37E-08    | 9.10E-07    | 1.246588272 |
| GO:0050789 | regulation of biological<br>process                             | 3.00E-19    | 2.44E-16    | 1.24961988  |
| GO:0050896 | response to stimulus                                            | 2.80E-07    | 1.18E-05    | 1.256142113 |
| GO:0051171 | regulation of nitrogen<br>compound metabolic<br>process         | 9.12E-08    | 4.58E-06    | 1.25734436  |
| GO:0050794 | regulation of cellular<br>process                               | 3.11E-20    | 4.45E-17    | 1.27881698  |
| GO:2000112 | regulation of cellular<br>macromolecule<br>biosynthetic process | 2.75E-06    | 9.14E-05    | 1.284856336 |
| GO:0010556 | regulation of<br>macromolecule<br>biosynthetic process          | 1.65E-06    | 5.61E-05    | 1.288265971 |
| GO:0051252 | regulation of RNA<br>metabolic process                          | 3.92E-06    | 0.000125388 | 1.294870459 |

|            |                                                                       |             |             |             |
|------------|-----------------------------------------------------------------------|-------------|-------------|-------------|
| GO:0019219 | regulation of nucleobase-<br>containing compound<br>metabolic process | 8.94E-07    | 3.24E-05    | 1.296744687 |
| GO:0080090 | regulation of primary<br>metabolic process                            | 4.47E-10    | 3.99E-08    | 1.297848651 |
| GO:0031323 | regulation of cellular<br>metabolic process                           | 2.77E-10    | 2.60E-08    | 1.299893454 |
| GO:0002376 | immune system process                                                 | 0.000377456 | 0.005769929 | 1.3019376   |
| GO:0031326 | regulation of cellular<br>biosynthetic process                        | 2.69E-07    | 1.15E-05    | 1.304158508 |
| GO:0051246 | regulation of protein<br>metabolic process                            | 5.62E-05    | 0.00121024  | 1.30712948  |
| GO:0080134 | regulation of response to<br>stress                                   | 0.003909866 | 0.033724324 | 1.308196915 |
| GO:0043412 | macromolecule<br>modification                                         | 3.25E-05    | 0.000754645 | 1.308634855 |
| GO:0036211 | protein modification<br>process                                       | 5.32E-05    | 0.001153838 | 1.310620953 |

### Molecular Function

| Term ID    | Term name         | p-value     | FDR         | Rich_Ratio  |
|------------|-------------------|-------------|-------------|-------------|
| GO:0005488 | binding           | 0.000654424 | 0.021146072 | 1.062499191 |
| GO:0043169 | cation binding    | 0.001348602 | 0.029881169 | 1.160418597 |
| GO:0043167 | ion binding       | 4.49E-05    | 0.002900776 | 1.163708958 |
| GO:0046872 | metal ion binding | 0.000781643 | 0.023313994 | 1.170887531 |
| GO:0005515 | protein binding   | 5.38E-08    | 2.78E-05    | 1.219342011 |



|            |                                                                                         |             |             |             |
|------------|-----------------------------------------------------------------------------------------|-------------|-------------|-------------|
| GO:0043168 | anion binding                                                                           | 0.001003861 | 0.027172172 | 1.23082706  |
| GO:0016740 | transferase activity                                                                    | 0.000957675 | 0.027006441 | 1.250033323 |
| GO:0003677 | DNA binding                                                                             | 0.000195455 | 0.008661429 | 1.261019131 |
| GO:0097367 | carbohydrate derivative<br>binding                                                      | 0.000134312 | 0.007183391 | 1.307768019 |
| GO:0042802 | identical protein binding                                                               | 7.20E-05    | 0.00429375  | 1.360242979 |
| GO:0098772 | molecular function<br>regulator                                                         | 0.00015861  | 0.007806899 | 1.374034105 |
| GO:0016772 | transferase activity,<br>transferring phosphorus-<br>containing groups                  | 0.001050484 | 0.027172172 | 1.385067854 |
| GO:0140110 | transcription regulator<br>activity                                                     | 8.06E-06    | 0.000735564 | 1.400624324 |
| GO:0000981 | RNA polymerase II<br>transcription factor<br>activity, sequence-specific<br>DNA binding | 4.40E-05    | 0.002900776 | 1.432205846 |
| GO:0005102 | receptor binding                                                                        | 6.50E-05    | 0.004031137 | 1.442099122 |
| GO:0003700 | DNA binding transcription<br>factor activity                                            | 3.64E-07    | 6.48E-05    | 1.520961554 |
| GO:0008134 | transcription factor<br>binding                                                         | 0.000827609 | 0.023770761 | 1.562533154 |
| GO:0016301 | kinase activity                                                                         | 0.000119867 | 0.006639793 | 1.576521794 |

|            |                                                              |             |             |             |
|------------|--------------------------------------------------------------|-------------|-------------|-------------|
| GO:0016773 | phosphotransferase<br>activity, alcohol group as<br>acceptor | 0.000170976 | 0.00803588  | 1.600096271 |
| GO:0004672 | protein kinase activity                                      | 0.000425082 | 0.015255637 | 1.615943379 |

## IL-1 $\beta$ + M-PgPs vs. IL-1 $\beta$

| Cellular Component |                                    |             |             |             |
|--------------------|------------------------------------|-------------|-------------|-------------|
| Term ID            | Term name                          | p-value     | FDR         | Rich_Ratio  |
| GO:0044425         | membrane part                      | 0.000407641 | 0.009756212 | 1.157619671 |
| GO:0005737         | cytoplasm                          | 0.003144943 | 0.042605079 | 1.167383583 |
| GO:0016021         | integral component of<br>membrane  | 0.000286061 | 0.008441149 | 1.200107562 |
| GO:0031224         | intrinsic component of<br>membrane | 8.73E-05    | 0.003686305 | 1.214848371 |
| GO:0005886         | plasma membrane                    | 1.91E-07    | 1.52E-05    | 1.339489256 |
| GO:0031982         | vesicle                            | 8.57E-06    | 0.000473274 | 1.343206947 |
| GO:0098588         | bounding membrane of<br>organelle  | 0.000238539 | 0.007785044 | 1.401640668 |
| GO:0097708         | intracellular vesicle              | 0.000375988 | 0.009308951 | 1.468707303 |
| GO:0031410         | cytoplasmic vesicle                | 0.000354198 | 0.009082654 | 1.471618517 |
| GO:0030054         | cell junction                      | 0.000149226 | 0.005357196 | 1.496101445 |
| GO:0044421         | extracellular region part          | 6.87E-12    | 8.22E-10    | 1.544512142 |
| GO:0005856         | cytoskeleton                       | 0.000572235 | 0.011188316 | 1.565884086 |
| GO:0005794         | Golgi apparatus                    | 0.000562425 | 0.011188316 | 1.596626971 |
| GO:0044433         | cytoplasmic vesicle part           | 2.50E-06    | 0.000163452 | 1.638184707 |
| GO:0012506         | vesicle membrane                   | 0.000956322 | 0.015968356 | 1.670127996 |

|            |                                 |             |             |             |
|------------|---------------------------------|-------------|-------------|-------------|
| GO:0005911 | cell-cell junction              | 0.002283548 | 0.032791752 | 1.691386329 |
| GO:0030659 | cytoplasmic vesicle<br>membrane | 0.000523723 | 0.011188316 | 1.722436255 |
| GO:0044459 | plasma membrane part            | 8.42E-17    | 2.53E-14    | 1.82837797  |
| GO:0005622 | intracellular                   | 9.58E-05    | 0.003822116 | 1.868759724 |
| GO:0098589 | membrane region                 | 0.001256865 | 0.020509757 | 1.900016741 |

### Biological Progress

| Term ID    | Term name                                             | p-value     | FDR         | Rich Ratio  |
|------------|-------------------------------------------------------|-------------|-------------|-------------|
| GO:0009987 | cellular process                                      | 7.69E-05    | 0.001051974 | 1.066690297 |
| GO:0010468 | regulation of gene<br>expression                      | 0.000535409 | 0.005372173 | 1.205553269 |
| GO:0060255 | regulation of<br>macromolecule metabolic<br>process   | 1.86E-06    | 4.33E-05    | 1.244465196 |
| GO:0019222 | regulation of metabolic<br>process                    | 7.45E-08    | 2.64E-06    | 1.262823516 |
| GO:0044281 | small molecule metabolic<br>process                   | 0.0079846   | 0.045465643 | 1.265946516 |
| GO:0006796 | phosphate-containing<br>compound metabolic<br>process | 0.00822178  | 0.046467675 | 1.27513042  |
| GO:0043412 | macromolecule<br>modification                         | 0.000641859 | 0.006229865 | 1.279893767 |
| GO:0065007 | biological regulation                                 | 1.57E-22    | 1.07E-19    | 1.289194305 |

|            |                                                                       |             |             |             |
|------------|-----------------------------------------------------------------------|-------------|-------------|-------------|
| GO:0050789 | regulation of biological<br>process                                   | 1.59E-20    | 5.73E-18    | 1.290514996 |
| GO:2000112 | regulation of cellular<br>macromolecule<br>biosynthetic process       | 1.72E-05    | 0.000298374 | 1.292781594 |
| GO:0019219 | regulation of nucleobase-<br>containing compound<br>metabolic process | 1.21E-05    | 0.000220505 | 1.295662422 |
| GO:0010556 | regulation of<br>macromolecule<br>biosynthetic process                | 1.05E-05    | 0.000193501 | 1.297316274 |
| GO:0031326 | regulation of cellular<br>biosynthetic process                        | 5.27E-06    | 0.000108389 | 1.301236316 |
| GO:0051171 | regulation of nitrogen<br>compound metabolic<br>process               | 7.40E-09    | 3.11E-07    | 1.315974372 |
| GO:0009889 | regulation of biosynthetic<br>process                                 | 1.36E-06    | 3.26E-05    | 1.317821209 |
| GO:0036211 | protein modification<br>process                                       | 0.000145974 | 0.001813534 | 1.327880067 |
| GO:0006464 | cellular protein<br>modification process                              | 0.000145974 | 0.001813534 | 1.327880067 |
| GO:0051252 | regulation of RNA<br>metabolic process                                | 5.47E-06    | 0.000111311 | 1.327882999 |

|            |                                             |          |          |             |
|------------|---------------------------------------------|----------|----------|-------------|
| GO:0050794 | regulation of cellular<br>process           | 5.61E-22 | 2.78E-19 | 1.32805914  |
| GO:0031323 | regulation of cellular<br>metabolic process | 4.00E-10 | 2.06E-08 | 1.335392068 |

### Molecular Function

| Term ID    | Term name                                                                               | p-value     | FDR         | Rich_Ratio  |
|------------|-----------------------------------------------------------------------------------------|-------------|-------------|-------------|
| GO:0005488 | binding                                                                                 | 0.000146458 | 0.004840103 | 1.078952436 |
| GO:0097367 | carbohydrate derivative<br>binding                                                      | 0.001006845 | 0.020867243 | 1.293887219 |
| GO:0140110 | transcription regulator<br>activity                                                     | 0.001477455 | 0.029295825 | 1.309010211 |
| GO:0019899 | enzyme binding                                                                          | 0.000296672 | 0.007918864 | 1.335352677 |
| GO:0000981 | RNA polymerase II<br>transcription factor<br>activity, sequence-specific<br>DNA binding | 0.00210959  | 0.036173138 | 1.353492506 |
| GO:0005515 | protein binding                                                                         | 4.49E-15    | 2.08E-12    | 1.362667305 |
| GO:0042802 | identical protein binding                                                               | 0.000217416 | 0.006858471 | 1.376593968 |
| GO:0003700 | DNA binding transcription<br>factor activity                                            | 0.000142427 | 0.004827167 | 1.426691746 |
| GO:0004872 | receptor activity                                                                       | 0.000258221 | 0.007314517 | 1.435701637 |
| GO:0004888 | transmembrane signaling<br>receptor activity                                            | 0.000705509 | 0.016118256 | 1.445309179 |
| GO:0099600 | transmembrane receptor<br>activity                                                      | 0.000705509 | 0.016118256 | 1.445309179 |

|            |                                                              |             |             |             |
|------------|--------------------------------------------------------------|-------------|-------------|-------------|
| GO:0046983 | protein dimerization<br>activity                             | 0.000116513 | 0.004479247 | 1.449311893 |
| GO:0060089 | molecular transducer<br>activity                             | 0.000104473 | 0.004143104 | 1.460042363 |
| GO:0038023 | signaling receptor activity                                  | 2.97E-05    | 0.00147466  | 1.524961546 |
| GO:0004871 | signal transducer activity                                   | 5.93E-06    | 0.000357838 | 1.555320617 |
| GO:0008092 | cytoskeletal protein<br>binding                              | 0.000190215 | 0.006139949 | 1.586626891 |
| GO:0016301 | kinase activity                                              | 0.000254457 | 0.007314517 | 1.61831856  |
| GO:0016773 | phosphotransferase<br>activity, alcohol group as<br>acceptor | 0.00023714  | 0.007155447 | 1.665084968 |
| GO:0098772 | molecular function<br>regulator                              | 2.58E-10    | 5.98E-08    | 1.753578801 |
| GO:0004672 | protein kinase activity                                      | 3.69E-05    | 0.001697726 | 1.842565143 |

### IL-1 $\beta$ + *P. gingivalis* vs. IL-1 $\beta$

#### Cellular Component

| Term ID    | Term name                          | p-value     | FDR         | Rich_Ratio  |
|------------|------------------------------------|-------------|-------------|-------------|
| GO:0016020 | membrane                           | 3.17E-05    | 0.0009779   | 1.14876665  |
| GO:0005737 | cytoplasm                          | 0.000238827 | 0.005377016 | 1.193306994 |
| GO:0044425 | membrane part                      | 1.93E-06    | 8.94E-05    | 1.196537891 |
| GO:0016021 | integral component of<br>membrane  | 7.99E-06    | 0.000331525 | 1.226589144 |
| GO:0031224 | intrinsic component of<br>membrane | 1.26E-06    | 6.21E-05    | 1.243623762 |

|            |                                                    |             |             |             |
|------------|----------------------------------------------------|-------------|-------------|-------------|
| GO:0043230 | extracellular organelle                            | 0.001006016 | 0.014680378 | 1.275710493 |
| GO:1903561 | extracellular vesicle                              | 0.000972214 | 0.014454809 | 1.276769759 |
| GO:0070062 | extracellular exosome                              | 0.000799315 | 0.013401286 | 1.282805657 |
| GO:0031982 | vesicle                                            | 1.24E-06    | 6.21E-05    | 1.339242459 |
| GO:0120038 | plasma membrane<br>bounded cell projection<br>part | 0.001906911 | 0.024236219 | 1.349793537 |
| GO:0044463 | cell projection part                               | 0.001906911 | 0.024236219 | 1.349793537 |
| GO:0005886 | plasma membrane                                    | 1.35E-09    | 1.33E-07    | 1.359703087 |
| GO:0098805 | whole membrane                                     | 0.00085404  | 0.013734355 | 1.400160609 |
| GO:0098588 | bounding membrane of<br>organelle                  | 1.76E-05    | 0.000660698 | 1.430129828 |
| GO:0097458 | neuron part                                        | 0.000133798 | 0.003194929 | 1.434419183 |
| GO:0097708 | intracellular vesicle                              | 0.000116286 | 0.002863541 | 1.461282028 |
| GO:0031410 | cytoplasmic vesicle                                | 0.000108275 | 0.002752279 | 1.464178523 |
| GO:0044421 | extracellular region part                          | 1.50E-13    | 2.37E-11    | 1.529804138 |
| GO:0030054 | cell junction                                      | 5.06E-06    | 0.000221465 | 1.548758227 |
| GO:0005794 | Golgi apparatus                                    | 0.000360637 | 0.007104549 | 1.556135489 |

### Biological Progress

| Term ID    | Term name                        | p-value     | FDR         | Rich_Ratio  |
|------------|----------------------------------|-------------|-------------|-------------|
| GO:0009987 | cellular process                 | 0.000306417 | 0.003446248 | 1.054840607 |
| GO:0010468 | regulation of gene<br>expression | 0.000144803 | 0.001818217 | 1.205529137 |

|            |                                                                       |             |             |             |
|------------|-----------------------------------------------------------------------|-------------|-------------|-------------|
| GO:0060255 | regulation of<br>macromolecule metabolic<br>process                   | 2.20E-07    | 6.81E-06    | 1.240935027 |
| GO:0044281 | small molecule metabolic<br>process                                   | 0.005406151 | 0.03462835  | 1.253307245 |
| GO:0031326 | regulation of cellular<br>biosynthetic process                        | 1.36E-05    | 0.000254173 | 1.258120754 |
| GO:0019222 | regulation of metabolic<br>process                                    | 4.41E-09    | 1.98E-07    | 1.259801952 |
| GO:2000112 | regulation of cellular<br>macromolecule<br>biosynthetic process       | 1.98E-05    | 0.000348488 | 1.26157082  |
| GO:0006796 | phosphate-containing<br>compound metabolic<br>process                 | 0.005174404 | 0.033430756 | 1.264813423 |
| GO:0050789 | regulation of biological<br>process                                   | 5.42E-21    | 1.81E-18    | 1.266120542 |
| GO:0010556 | regulation of<br>macromolecule<br>biosynthetic process                | 1.16E-05    | 0.000222067 | 1.266305254 |
| GO:0019219 | regulation of nucleobase-<br>containing compound<br>metabolic process | 9.19E-06    | 0.000179797 | 1.270213604 |
| GO:0065007 | biological regulation                                                 | 2.48E-24    | 1.82E-21    | 1.272845377 |



|            |                                                         |          |             |             |
|------------|---------------------------------------------------------|----------|-------------|-------------|
| GO:0009889 | regulation of biosynthetic<br>process                   | 2.66E-06 | 5.97E-05    | 1.277547674 |
| GO:0051171 | regulation of nitrogen<br>compound metabolic<br>process | 1.33E-08 | 5.52E-07    | 1.279554731 |
| GO:0031323 | regulation of cellular<br>metabolic process             | 2.81E-10 | 1.62E-08    | 1.305062425 |
| GO:0050794 | regulation of cellular<br>process                       | 3.82E-23 | 2.23E-20    | 1.305097784 |
| GO:0043412 | macromolecule<br>modification                           | 5.04E-05 | 0.000760879 | 1.305661626 |
| GO:0080090 | regulation of primary<br>metabolic process              | 6.14E-11 | 4.09E-09    | 1.318686966 |
| GO:0036211 | protein modification<br>process                         | 4.66E-05 | 0.000707986 | 1.318890703 |
| GO:0006464 | cellular protein<br>modification process                | 4.66E-05 | 0.000707986 | 1.318890703 |

### Molecular Function

| Term ID    | Term name                                    | p-value     | FDR         | Rich_Ratio  |
|------------|----------------------------------------------|-------------|-------------|-------------|
| GO:0005488 | binding                                      | 2.74E-05    | 0.001507438 | 1.07935713  |
| GO:0043167 | ion binding                                  | 0.001489175 | 0.026377234 | 1.126222163 |
| GO:0043168 | anion binding                                | 0.000132944 | 0.00539121  | 1.278248291 |
| GO:0003700 | DNA binding transcription<br>factor activity | 0.002456002 | 0.036744649 | 1.29499436  |
| GO:0019899 | enzyme binding                               | 0.000227806 | 0.007313534 | 1.308066488 |

|            |                                                              |             |             |             |
|------------|--------------------------------------------------------------|-------------|-------------|-------------|
| GO:0097367 | carbohydrate derivative<br>binding                           | 0.000138688 | 0.005479954 | 1.312563406 |
| GO:0004872 | receptor activity                                            | 0.00230739  | 0.034859683 | 1.317359135 |
| GO:0060089 | molecular transducer<br>activity                             | 0.001270022 | 0.023298859 | 1.334076332 |
| GO:0005515 | protein binding                                              | 1.46E-16    | 2.26E-13    | 1.345226957 |
| GO:0046983 | protein dimerization<br>activity                             | 0.000539481 | 0.01385567  | 1.357050641 |
| GO:0038023 | signaling receptor activity                                  | 0.000458833 | 0.012404586 | 1.386060918 |
| GO:0042802 | identical protein binding                                    | 1.40E-05    | 0.000937138 | 1.405622228 |
| GO:0030234 | enzyme regulator activity                                    | 0.001566421 | 0.02670623  | 1.40905318  |
| GO:0004871 | signal transducer activity                                   | 3.21E-05    | 0.001703407 | 1.452868467 |
| GO:0016301 | kinase activity                                              | 0.001538416 | 0.02670623  | 1.468499244 |
| GO:0008289 | lipid binding                                                | 0.003329061 | 0.044609421 | 1.483260648 |
| GO:0005509 | calcium ion binding                                          | 0.001618995 | 0.026826565 | 1.543831707 |
| GO:0016773 | phosphotransferase<br>activity, alcohol group as<br>acceptor | 0.000598128 | 0.014630411 | 1.550134967 |
| GO:0008092 | cytoskeletal protein<br>binding                              | 1.39E-05    | 0.000937138 | 1.625938837 |
| GO:0004857 | enzyme inhibitor activity                                    | 0.003143996 | 0.043590876 | 1.629736492 |
