# Supplementary material for: RNA Sequencing Reveals the Upregulation of FOXO Signaling Pathway in Porphyromonas gingivalis Persister-Treated Human Gingival Epithelial Cells
Source: MDPI journal article supplement (doi:10.3390/ijms23105728), 2022-05-20
Supplement: s1 [file s1]

**Table S2** Numbers of terms significantly enriched within each category.

|    | M-PgPs vs. BL | <i>P. gingivalis</i> vs. BL | IL-1 $\beta$ + M-PgPs<br>Vs. IL-1 $\beta$ | IL-1 $\beta$ + <i>P. gingivalis</i><br>Vs. IL-1 $\beta$ |
|----|---------------|-----------------------------|-------------------------------------------|---------------------------------------------------------|
| CC | 24            | 31                          | 55                                        | 71                                                      |
| BP | 712           | 996                         | 1238                                      | 1310                                                    |
| MF | 54            | 77                          | 95                                        | 120                                                     |
